# Supplementary material for: Biochemical and physiological characterization of fut4 and fut6 mutants defective in arabinogalactan-protein fucosylation in Arabidopsis
Source: PubMed Central journal article supplement (PMC3871811; doi:10.1093/jxb/ert321), 2013-10-14
Supplement: supp_ert321_jexbot098897_file001.pdf [file supp_ert321_jexbot098897_file001.pdf]

Figure S1

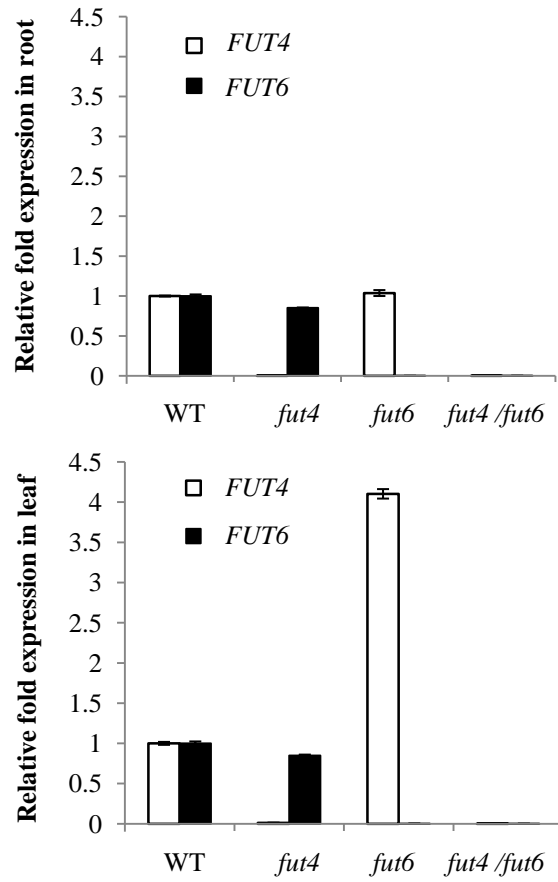

**Figure S1.** RT-qPCR analysis of *FUT4* and *FUT6* mRNA level in root and leaf tissues of Arabidopsis wild type and *fut4*, *fut6* and *fut4/fut6* double mutant plants.

Figure S2

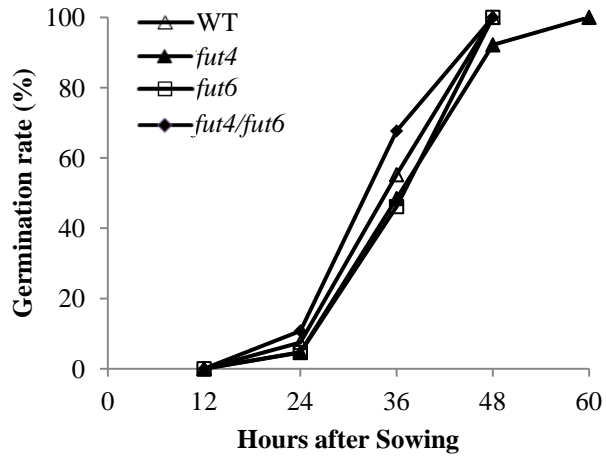

**Figure S2.** Germination rate of Arabidopsis *fut4*, *fut6* and *fut4/fut6* double mutant and wild type plants. Plant seeds were sown on MS plates containing 0.5% sucrose. Over 50 seeds were analyzed for each line.

# Figure S3

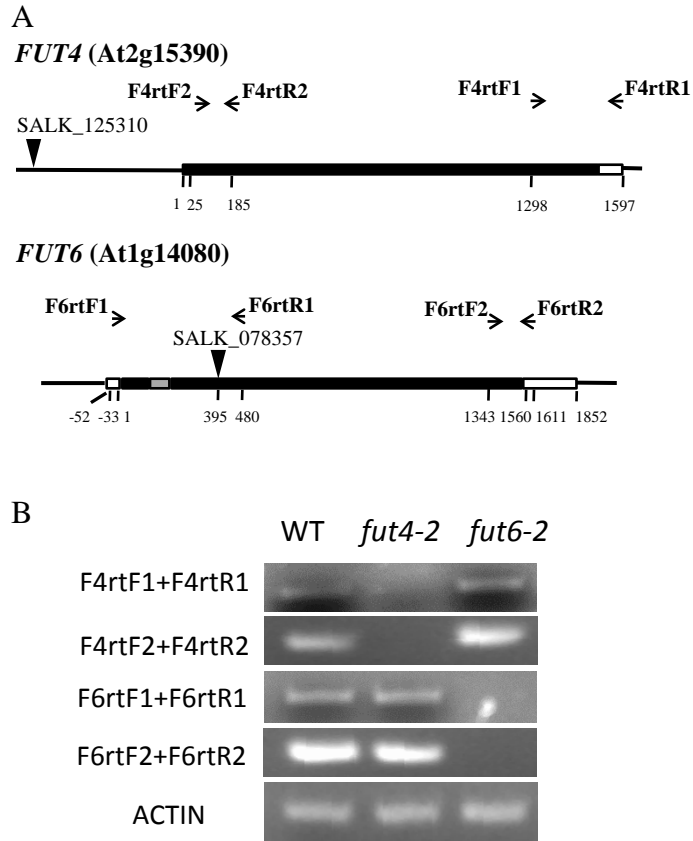

**Figure S3.** RNA transcript levels of *FUT4* and *FUT6* genes in homozygous *fut4-2*, *fut6-2* mutant and wild type seedlings. A, Schematic diagrams of mutant *FUT4* and *FUT6* genes with T-DNA insertions. Black box, grey box and white box represent exons, introns and untranslated regions, respectively. B, RT-PCR of total RNAs isolated from Arabidopsis seedlings 15 DAG. Positions of the RT-PCR primers are shown in A with arrows. *ACTIN* was used as a control for loading.

Figure S4

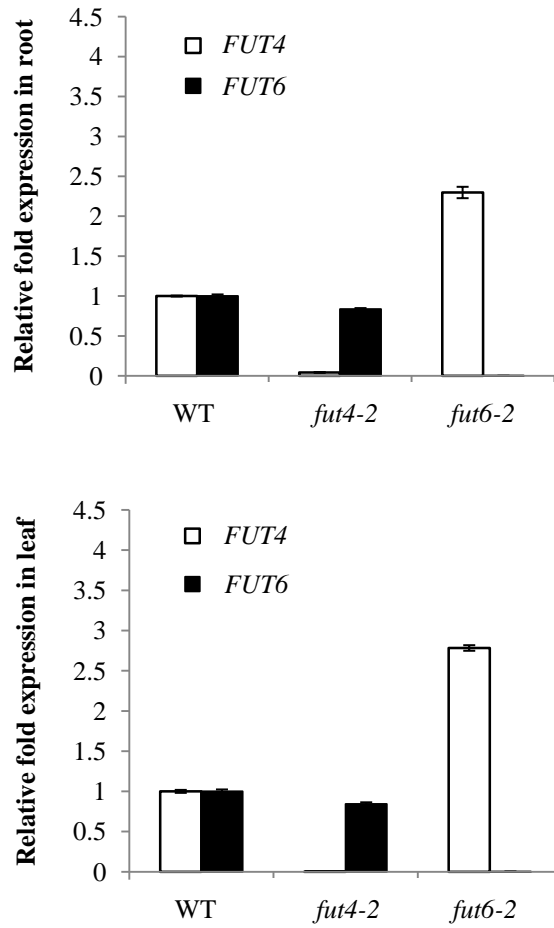

**Figure S4.** RT-qPCR analysis of *FUT4* and *FUT6* mRNA level in root and leaf tissues of Arabidopsis wild type and *fut4-2* and *fut6-2* mutant plants.

Figure S5

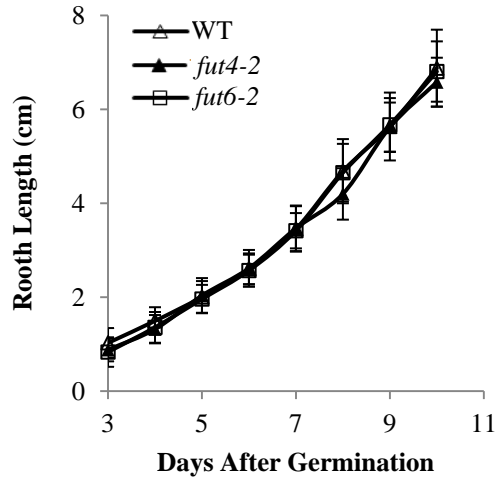

**Figure S5.** Root growth of Arabidopsis wild type, *fut4-2*, *fut6-2* mutant plants. Plants were grown on MS plates containing 0.5% sucrose. Root length was measured daily as a function of time from 3-10 DAG. Values shown were averages of data from over 24 individual plants per line, with standard errors shown as error bars.

## Figure S6

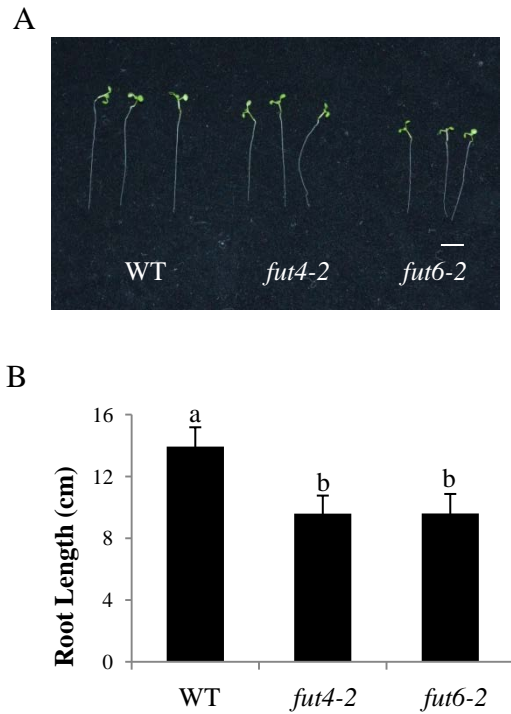

**Figure S6.** Root length measurement of *Arabidopsis fut4-2*, *fut6-2* and wild type plants grown under salt stress. *Arabidopsis* seeds were germinated on NaCl-free MS plates and then transferred to MS plates containing 150 mM NaCl on the 3 DAG. A, Seedling images of wild type, *fut4-2* and *fut6-2* mutant plants on the 10<sup>th</sup> day after transfer. Three representative seedlings of each plant line were photographed. Scale bar, 3 cm. B, Measurement of primary root length on the 10<sup>th</sup> day after transfer. Data and error bars represent mean  $\pm$  SD (n = 31). Values annotated with different letters are significantly different ( $P < 0.01$ ; Tukey honestly significant difference test).

# Table S1

**Table S1.** Sequence and annealing temperatures of the primers used in this work

| Purpose                                 | Name    | Primer Sequences (5'→3')            | Annealing |
|-----------------------------------------|---------|-------------------------------------|-----------|
| Absence of insertion of <i>FUT4</i>     | F4LP    | CCATGTAGTTACATTCCCAACCG             | 54° C     |
|                                         | F4RP    | CCACGTCGATGGAGCCTTGTTT              |           |
| Presence of insertion 1 in SAIL_284_B05 | LB3     | TAGCATCTGAATTTTCATAACCAATCTCGATACAC | 49° C     |
|                                         | F4RP    | GAACATGTTTTTCAGAGCGAGC              |           |
| Presence of insertion 2 in SAIL_284_B05 | LB3     | TAGCATCTGAATTTTCATAACCAATCTCGATACAC | 54° C     |
|                                         | F4LP    | CCATGTAGTTACATTCCCAACCG             |           |
| Absence of insertion of <i>FUT6</i>     | F6LP    | CACATCTTTCAGATCTCCAGCG              | 55° C     |
|                                         | F6RP    | CTTCTTGTAAGCATCCGTGC                |           |
| Presence of insertion 1 in SALK_099500  | LBa1    | TGGTTCACGTAGTGGGCCATCG              | 54° C     |
|                                         | F6RP    | CTTCTTGTAAGCATCCGTGC                |           |
| Presence of insertion 2 in SALK_099500  | LBa1    | TGGTTCACGTAGTGGGCCATCG              | 54° C     |
|                                         | F6LP    | TGTTTTGCTAGCAACGAAAGC               |           |
| RT -PCR for <i>FUT4</i> 3' end primers  | F4rtF1  | TGGAGGATTAAGCCATGGTTAC              | 52° C     |
|                                         | F4rtR1  | AATGAAAAAGGAAGATATATAACA            |           |
| RT -PCR for <i>FUT6</i> 5' end primers  | F6rtF1  | TCCAGCGAAGTTTTTCAGAGC               | 52° C     |
|                                         | F6rtR1  | CGCAACCCACACAATGTATC                |           |
| RT -PCR for <i>FUT4</i> 5' end primers  | F4rtF2  | GCGAAGTTATCAAGGGTTTGGG              | 58° C     |
|                                         | F4rtR2  | CTTGTATCGCAAGCCTTCACC               |           |
| RT -PCR for <i>FUT6</i> 3' end primers  | F6rtF2  | TGGAGGATTAAGCCATGGTTAC              | 58° C     |
|                                         | F6rtR2  | GGATTGTGAGTTATTGAAACAGAGA           |           |
| RT -PCR for <i>ACTIN</i>                | Actin F | GTCGTACTIONACCGGTATTGTGCTCG         | 58° C     |
|                                         | Actin R | CGGCGATTCCAGGGAACATTGTGG            |           |
| Ubiquitin 10 for RT-qPCR                | Ubi F   | GTCGACCCTTCACTTGGTGT                | 58° C     |
|                                         | Ubi R   | ATCCTCAAGCTGCTTCCAG                 |           |

## Table S2

**Table S2.** Statistic analysis for comparisons of root length measurements among wild type and *fut4*, *fut4-2*, *fut6*, *fut6-2*, *fut4/fut6* mutant plants grown under salt stress.

| <i>P</i> <sup>a</sup> | WT                | <i>fut4</i>       | <i>fut4-2</i>     | <i>fut6</i>       | <i>fut6-2</i>     | <i>fut4/fut6</i>  |
|-----------------------|-------------------|-------------------|-------------------|-------------------|-------------------|-------------------|
| WT                    | -                 | <10 <sup>-4</sup> | <10 <sup>-4</sup> | <10 <sup>-4</sup> | <10 <sup>-4</sup> | <10 <sup>-4</sup> |
| <i>fut4</i>           | <10 <sup>-4</sup> | -                 | 0.9462            | 0.9909            | 0.9382            | 0.0013            |
| <i>fut4-2</i>         | <10 <sup>-4</sup> | 0.9462            | -                 | 0.9997            | 1.0000            | <10 <sup>-4</sup> |
| <i>fut6</i>           | <10 <sup>-4</sup> | 0.9909            | 0.9997            | -                 | 0.9995            | <10 <sup>-4</sup> |
| <i>fut6-2</i>         | <10 <sup>-4</sup> | 0.9382            | 1.0000            | 0.9995            | -                 | <10 <sup>-4</sup> |
| <i>fut4/fut6</i>      | <10 <sup>-4</sup> | 0.0013            | <10 <sup>-4</sup> | <10 <sup>-4</sup> | <10 <sup>-4</sup> | -                 |

<sup>a</sup>One-way ANOVA was performed using JMP software and showed significant difference ( $P < 0.0001$ ) in root lengths among wild type and mutant lines grown under salt stress (150 mM NaCl). Significant levels of differences in root lengths were subsequently analyzed by Tukey honestly significant difference test as presented in this table. For root measurement data and plant growth conditions see Fig. 5 and Fig. S6.



## Table S3

**Table S3.** Expanded list of all plant cell wall glycan-directed monoclonal antibodies (mAbs) used in this study for glycome profiling (Fig. 7 and Fig. 8).

| Glycan Group Recognized       | mAb Name <sup>a</sup>     |
|-------------------------------|---------------------------|
| Non-Fucosylated<br>Xyloglucan | <a href="#">CCRC-M54</a>  |
|                               | <a href="#">CCRC-M48</a>  |
|                               | <a href="#">CCRC-M49</a>  |
|                               | <a href="#">CCRC-M96</a>  |
|                               | <a href="#">CCRC-M50</a>  |
|                               | <a href="#">CCRC-M51</a>  |
|                               | <a href="#">CCRC-M53</a>  |
|                               | <a href="#">CCRC-M100</a> |
|                               | <a href="#">CCRC-M103</a> |
|                               | <a href="#">CCRC-M58</a>  |
|                               | <a href="#">CCRC-M86</a>  |
|                               | <a href="#">CCRC-M55</a>  |
|                               | <a href="#">CCRC-M52</a>  |
|                               | <a href="#">CCRC-M99</a>  |
|                               | <a href="#">CCRC-M95</a>  |
|                               | <a href="#">CCRC-M101</a> |
|                               | <a href="#">CCRC-M104</a> |
|                               | <a href="#">CCRC-M89</a>  |
|                               | <a href="#">CCRC-M93</a>  |
|                               | <a href="#">CCRC-M87</a>  |
| <a href="#">CCRC-M88</a>      |                           |
| <a href="#">CCRC-M57</a>      |                           |
| <a href="#">CCRC-M90</a>      |                           |
| Fucosylated<br>Xyloglucan     | <a href="#">CCRC-M102</a> |
|                               | <a href="#">CCRC-M39</a>  |
|                               | <a href="#">CCRC-M106</a> |
|                               | <a href="#">CCRC-M84</a>  |
| Xylan 1/XG                    | <a href="#">CCRC-M1</a>   |
|                               | <a href="#">CCRC-M111</a> |
|                               | <a href="#">CCRC-M108</a> |
|                               | <a href="#">CCRC-M109</a> |

Xylan 2

Xylan 3

Xylan 4

Seed  
Galactomannan

Homogalacturonan  
Backbone

Rhamnogalacturonan I  
Backbone

[CCRC-M119](#)

[CCRC-M115](#)

[CCRC-M110](#)

[CCRC-M105](#)

[CCRC-M117](#)

[CCRC-M113](#)

[CCRC-M120](#)

[CCRC-M118](#)

[CCRC-M116](#)

[CCRC-M114](#)

CCRC-M154

CCRC-M150

CCRC-M160

[CCRC-M137](#)

CCRC-M152

CCRC-M149

CCRC-M144

CCRC-M146

CCRC-M145

CCRC-M155

CCRC-M153

CCRC-M151

CCRC-M148

[CCRC-M140](#)

[CCRC-M139](#)

[CCRC-M138](#)

[CCRC-M75](#)

[CCRC-M70](#)

[CCRC-M74](#)

[CCRC-M131](#)

[CCRC-M38](#)

[JIM5](#)

[JIM136](#)

[JIM7](#)

[CCRC-M34](#)

[CCRC-M69](#)

[CCRC-M35](#)

[CCRC-M36](#)

|                                          |                                                                                                                                                                                                                                                                                                                                                                                                                                                                                                                                                    |
|------------------------------------------|----------------------------------------------------------------------------------------------------------------------------------------------------------------------------------------------------------------------------------------------------------------------------------------------------------------------------------------------------------------------------------------------------------------------------------------------------------------------------------------------------------------------------------------------------|
|                                          | <a href="#">CCRC-M14</a><br><a href="#">CCRC-M129</a><br><a href="#">CCRC-M72</a>                                                                                                                                                                                                                                                                                                                                                                                                                                                                  |
| Linseed Mucilage<br>Rhamnogalacturonan I | <a href="#">CCRC-M40</a>                                                                                                                                                                                                                                                                                                                                                                                                                                                                                                                           |
| Physcomitrella<br>Pectin                 | <a href="#">CCRC-M98</a><br><a href="#">CCRC-M94</a>                                                                                                                                                                                                                                                                                                                                                                                                                                                                                               |
| Rhamnogalacturonan IA                    | <a href="#">CCRC-M5</a><br><a href="#">CCRC-M2</a>                                                                                                                                                                                                                                                                                                                                                                                                                                                                                                 |
| Rhamnogalacturonan IB                    | <a href="#">CCRC-M23</a><br><a href="#">CCRC-M17</a><br><a href="#">CCRC-M19</a><br><a href="#">CCRC-M18</a><br><a href="#">CCRC-M56</a><br><a href="#">CCRC-M16</a>                                                                                                                                                                                                                                                                                                                                                                               |
| Rhamnogalacturonan IC                    | <a href="#">JIM137</a><br><a href="#">JIM101</a><br><a href="#">CCRC-M61</a><br><a href="#">CCRC-M30</a>                                                                                                                                                                                                                                                                                                                                                                                                                                           |
| Rhamnogalacturonan I<br>Arabinogalactan  | <a href="#">CCRC-M60</a><br><a href="#">CCRC-M41</a><br><a href="#">CCRC-M80</a><br><a href="#">CCRC-M79</a><br><a href="#">CCRC-M44</a><br><a href="#">CCRC-M33</a><br><a href="#">CCRC-M32</a><br><a href="#">CCRC-M13</a><br><a href="#">CCRC-M42</a><br><a href="#">CCRC-M24</a><br><a href="#">CCRC-M12</a><br><a href="#">CCRC-M7</a><br><a href="#">CCRC-M77</a><br><a href="#">CCRC-M25</a><br><a href="#">CCRC-M9</a><br><a href="#">CCRC-M128</a><br><a href="#">CCRC-M126</a><br><a href="#">CCRC-M134</a><br><a href="#">CCRC-M125</a> |

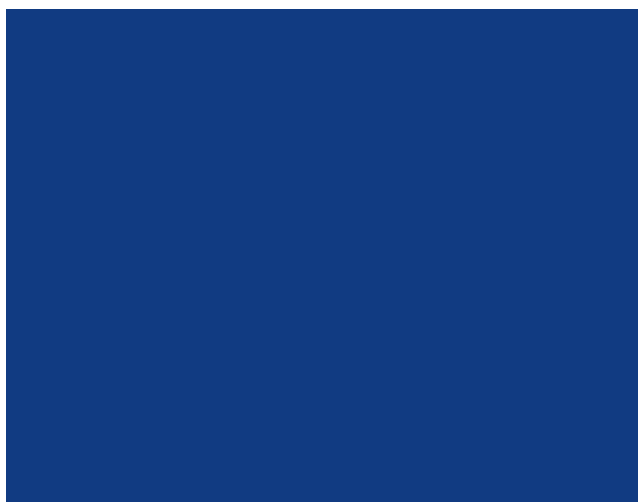

Arabinogalactan 1

Arabinogalactan 2

Arabinogalactan 3

Arabinogalactan 4

[CCRC-M123](#)

[CCRC-M122](#)

[CCRC-M121](#)

[CCRC-M112](#)

[CCRC-M21](#)

[JIM131](#)

[CCRC-M22](#)

[JIM132](#)

[JIM1](#)

[CCRC-M15](#)

[CCRC-M8](#)

[MH4.3E5](#)

[JIM16](#)

[JIM93](#)

[JIM94](#)

[JIM11](#)

[MAC204](#)

[JIM20](#)

[JIM14](#)

[MAC207](#)

[JIM19](#)

[JIM12](#)

[CCRC-M133](#)

[CCRC-M107](#)

[JIM4](#)

[CCRC-M31](#)

[JIM17](#)

[CCRC-M26](#)

[JIM15](#)

[JIM8](#)

[CCRC-M85](#)

[CCRC-M81](#)

[MAC266](#)

[PN 16.4B4](#)

[JIM133](#)

[JIM13](#)

[CCRC-M92](#)

[CCRC-M91](#)

|              |
|--------------|
|              |
| Unidentified |

[CCRC-M78](#)

[MAC265](#)

[CCRC-M97](#)

---

<sup>a</sup>The majority of listings link to the WallMabDB plant cell wall monoclonal antibody database (<http://www.wallmabdb.net>) that provides detailed descriptions of each mAb, including immunogen, antibody isotype, epitope structure (to the extent known), supplier information, and related literature citations.

---
